# Supplementary material for: The Effects of Drought in the Huaibei Plain of China Due to Climate Change
Source: MDPI journal article supplement (doi:10.3390/atmos14050860), 2023-05-11
Supplement: s1 [file s1]

Archive with 1 entries (1 files):
- atmosphere-2326811-supplementary.pdf
