# Supplementary material for: The Effects of Drought in the Huaibei Plain of China Due to Climate Change
Source: MDPI journal article supplement (doi:10.3390/atmos14050860), 2023-05-11
Supplement: s1 [file s1 › atmosphere-2326811-supplementary.pdf]

# The Effects of Drought in the Huaibei Plain of China Due to Climate Change

Ousmane Badji <sup>1</sup>, Yonghua Zhu <sup>1,\*</sup>, Haishen Lü <sup>1,\*</sup>, Kanon Guedet Guede <sup>1</sup>, Tingxing Chen <sup>1</sup>, Abdoulaye Oumarou <sup>1</sup>, Kouassi Bienvenue Mikael Onan Yao <sup>1</sup> and Sika Brice <sup>2</sup>

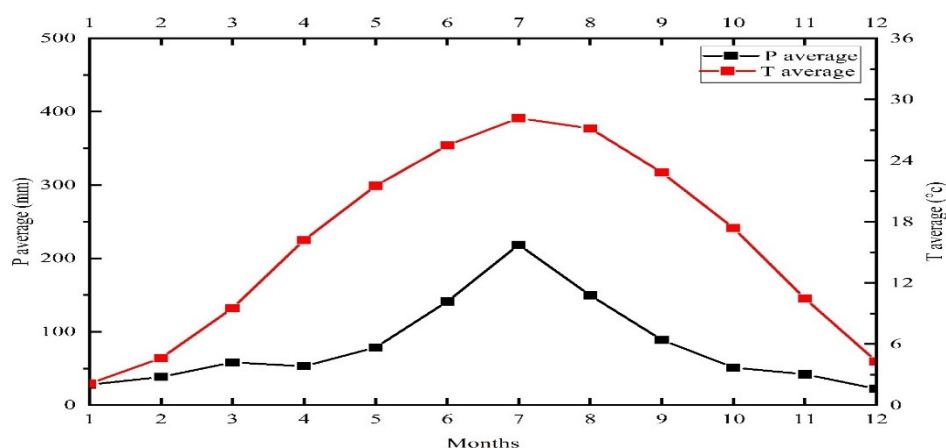

**Figure S1.** Monthly average temperature and precipitation between 1985-2017. “P” indicates monthly precipitation, and “T” the monthly temperature.

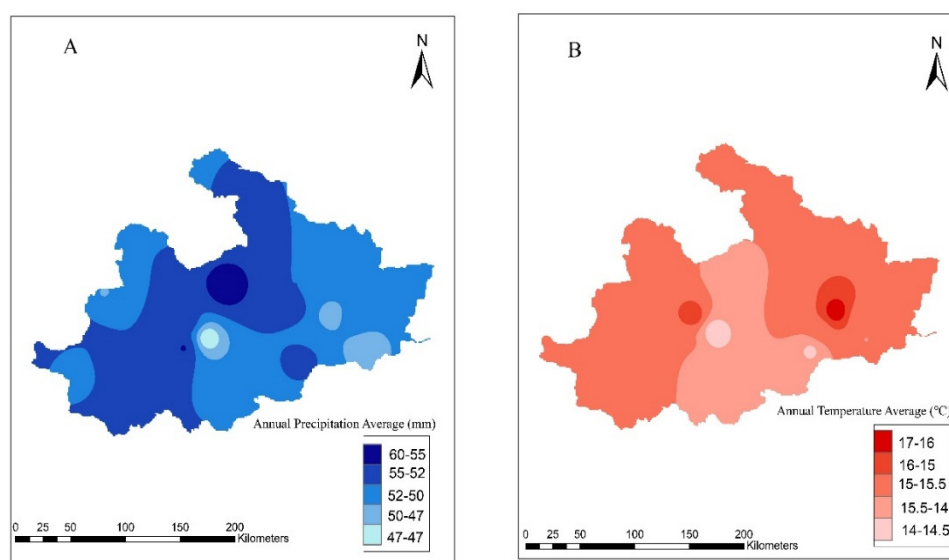

**Figure S2.** Annual average temperature and precipitation during the period 1985-2017. In these charts, A indicates annual precipitation, and B is the annual temperature.
